# Supplementary material for: The impact of halogen ions on the guest dependent spin crossover behaviour and porosity of Co(ii) one-dimensional coordination polymers [CoX2(4′-(4-pyridyl)-2,2′:6′,2′′-terpyridine)] (X = Cl and Br)
Source: Royal Society of Chemistry journal article supplement (doi:10.1039/c5tc00864f), 2015-01-01
Supplement: c5tc00864f1.pdf [file c5tc00864f1.pdf]

## Supporting Information

### **Impact of halogen ions on the guest dependent spin crossover behavior and porosity of Co(II) one-dimensional coordination polymers [Co (4'-(4-pyridyl)-2,2':6',2''-terpyridine)X<sub>2</sub>] (X = Cl and Br)**

Ryo Ohtani, Kodai Shimayama, Akio Mishima, Masaaki Ohba, Ryuta Ishikawa, Satoshi Kawata, Masaaki Nakamura, Leonard F. Lindoy, and Shinya Hayami

Corresponding authors:

S. Hayami, [hayami@sci.kumamoto-u.ac.jp](mailto:hayami@sci.kumamoto-u.ac.jp)

## Experimental Sections

### Synthesis

#### [CoCl<sub>2</sub>(pyterpy)]·2H<sub>2</sub>O (1·2H<sub>2</sub>O)

Single crystals of **1·2H<sub>2</sub>O** were prepared as follows. The pyterpy (1 equiv.) was dissolved in hot MeOH, then CoCl<sub>2</sub> (1 equiv.) in MeOH was added to the solution. This mixture was stirred at room temperature for 8h and a brown precipitate was obtained by filtration. Orange brown crystals of **1·2H<sub>2</sub>O** were obtained by slow evaporation of the filtrate.

#### [CoBr<sub>2</sub>(pyterpy)]·MeOH (2·MeOH)

Single crystals of **2·MeOH** were prepared by a literature method.<sup>[1]</sup> The pyterpy (1 equiv.) in MeOH was placed in one sidearm of an H-tube. CoBr<sub>2</sub>·6H<sub>2</sub>O (1 equiv.) was placed in the other side, and MeOH was gently layered over both sides until the H-tube was full. After two weeks brown crystals of **2·MeOH** had formed. The MeOH solvent molecules were exchanged by H<sub>2</sub>O from the atmosphere immediately after filtration to yield **2·H<sub>2</sub>O**. **2·H<sub>2</sub>O**: Anal. Calcd for Br<sub>2</sub>C<sub>20</sub>CoH<sub>16</sub>N<sub>4</sub>O: C, 43.91; H, 2.95; N, 10.24. Found: C, 43.61; H, 3.18; N, 10.21.

[1] S. Hayami, K. Hashiguchi, G. Juhasz, M. Ohba, H. Okawa, Y. Maeda, K. Kato, K. Osaka, M. Takata, K. Inoue, *Inorg. Chem.*, 2004, **43**, 4124.

### Physical measurements

Temperature-dependent magnetic susceptibilities were measured by a Superconducting Quantum Interference Device (SQUID) magnetometer at field strengths of 1 T. X-ray powder diffraction (XRPD) patterns were performed on a Rigaku SmartLab X-ray diffractometer (RAD-2A with a 2.0 kW Cu K $\alpha$ X-ray). Single-crystal X-ray data were recorded on a Rigaku/XtaLAB P200 MM007HF-DW diffractometer and processed using Rigaku/CrystalClear software. The structure was solved by direct methods (Sir 2004)<sup>[1]</sup> and refined by full-matrix least-squares refinement using the SHELXL-2013 computer program. The hydrogen atoms were refined geometrically by using a riding model. TGA curves were generated by a thermal analyzer (Seiko Instruments, EXSTAR 6000) at scan rate 5 K/min. Adsorption isotherms were measured with BELSORP-max volumetric adsorption equipment. Elemental analyses (C,H,N) were carried out on a J-SCIENCE LAB JM10 analyser at the Instrumental Analysis Centre of Kumamoto University.

Table S1 Crystal Parameters for **1·2H<sub>2</sub>O** and **2·MeOH**

|                           | <b>1·2H<sub>2</sub>O</b>  | <b>2·MeOH</b>             |
|---------------------------|---------------------------|---------------------------|
| Formula                   | C20 H14 Cl2 Co N4 O2      | C21 H18 Br2 Co N4 O       |
| Formula weight            | 474.21                    | 561.14                    |
| Temperature / K           | 100                       | 100                       |
| Crystal System            | monoclinic                | monoclinic                |
| Space Group               | P 2 <sub>1</sub> /n (#13) | P 2 <sub>1</sub> /c (#14) |
| <i>a</i> / Å              | 8.8298 (6)                | 8.5932 (7)                |
| <i>b</i> / Å              | 11.2957 (8)               | 10.7755 (8)               |
| <i>c</i> / Å              | 10.6572 (7)               | 21.7683 (18)              |
| $\alpha$ / deg            | 90.0000                   | 90.0000                   |
| $\beta$ / deg             | 112.828 (9)               | 97.685 (13)               |
| $\gamma$ / deg            | 90.0000                   | 90.0000                   |
| <i>V</i> / Å <sup>3</sup> | 979.68                    | 1997.55                   |
| Z values                  | 2                         | 4                         |
| R - Factor                | 3.44                      | 9.56                      |

Table S2 Selected Bond Lengths and Angles for **1·2H<sub>2</sub>O**

|                  |           |               |          |
|------------------|-----------|---------------|----------|
| Bond Length (Å)  |           |               |          |
| Co-N(1)          | 2.173(2)  |               |          |
| Co-N(2)          | 2.079(2)  |               |          |
| Co-N(3)          | 2.142(2)  |               |          |
| Bond Angle (deg) |           |               |          |
| N(1)-Co-N(1)     | 151.66(9) | N(1)-Co-Cl(1) | 88.61(6) |
| N(1)-Co-N(2)     | 75.83(9)  | N(2)-Co-Cl(1) | 90.67(7) |
| N(1)-Co-N(3)     | 104.17(9) | N(3)-Co-Cl(1) | 89.33(6) |

Table S3 Selected Bond Lengths and Angles for **2·MeOH**

|                  |          |               |          |
|------------------|----------|---------------|----------|
| Bond Length (Å)  |          |               |          |
| Co-N(1)          | 2.009(9) | Co-N(4)       | 1.982(9) |
| Co-N(2)          | 1.865(9) |               |          |
| Co-N(3)          | 1.975(9) |               |          |
| Bond Angle (deg) |          |               |          |
| N(1)-Co-N(2)     | 80.6(4)  | N(2)-Co-Br(1) | 86.5(3)  |
| N(1)-Co-N(3)     | 163.1(4) | N(3)-Co-Br(1) | 84.2(3)  |
| N(1)-Co-N(4)     | 99.1(4)  | N(4)-Co-Br(1) | 93.3(3)  |
| N(2)-Co-N(3)     | 82.6(4)  | N(1)-Co-Br(2) | 88.0(3)  |
| N(2)-Co-N(4)     | 179.6(4) | N(2)-Co-Br(2) | 86.6(3)  |
| N(3)-Co-N(4)     | 97.7(4)  | N(3)-Co-Br(2) | 91.4(3)  |
| N(1)-Co-Br(1)    | 94.4(3)  | N(4)-Co-Br(2) | 93.5(3)  |

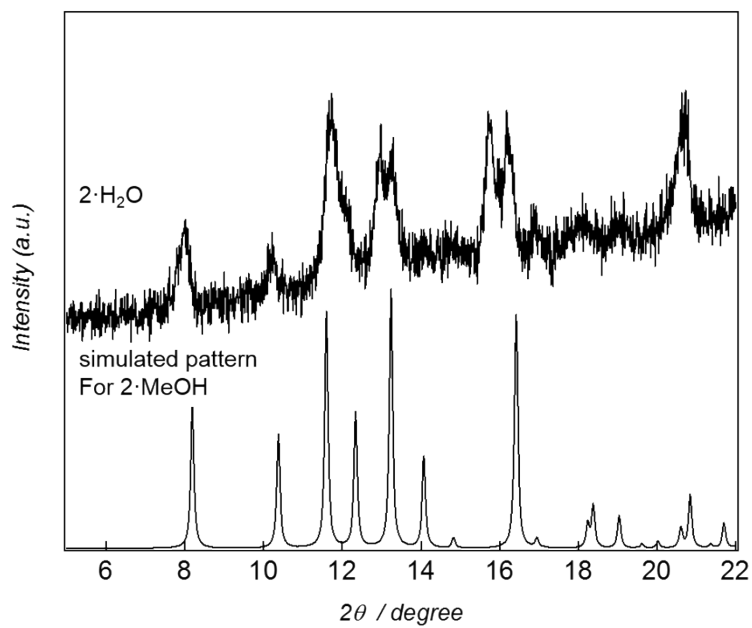

Figure S1 XRPD for **2·MeOH** and **2·H<sub>2</sub>O**

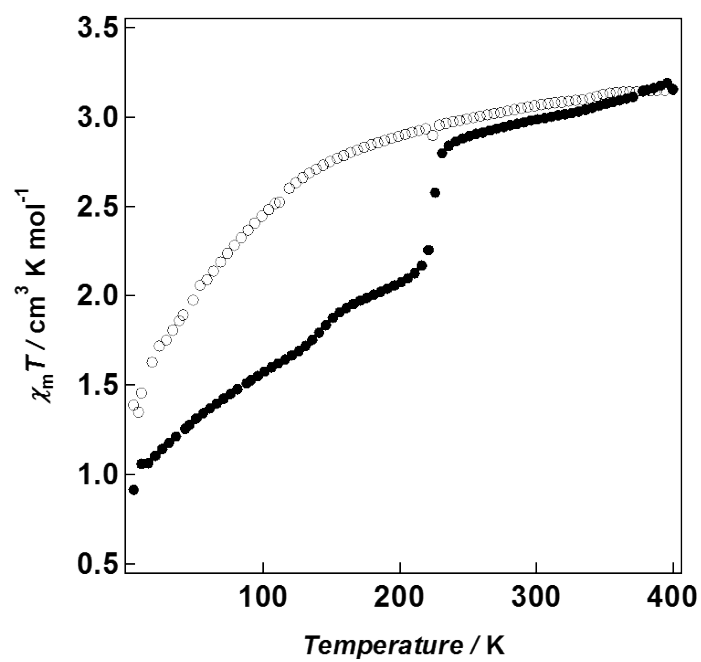

Figure S2 Magnetic properties for **1·2H<sub>2</sub>O** (filled circle) and its desolvated compound **1** (open circle).
